# Supplementary material
Source: PubMed Central journal article supplement (PMC6251633)
Supplement: ntx244_suppl_supplemental-table-a.pdf [file ntx244_suppl_supplemental-table-a.pdf]

Supplemental Table A. *Demographics of participants, May 2016*

|                                        | Means ( <i>SD</i> ) or <i>N</i> 's (valid %) |                         |
|----------------------------------------|----------------------------------------------|-------------------------|
|                                        | Adults ( <i>N</i> = 238)                     | Youth ( <i>N</i> = 237) |
| <b>Age</b>                             | <i>M</i> = 40.70 (13.85)                     | <i>M</i> = 12.54 (.99)  |
| <b>Sex</b>                             |                                              |                         |
| Male                                   | 133 (55.9%)                                  | 107 (45.3%)             |
| Female                                 | 105 (44.1%)                                  | 123 (52.1%)             |
| Prefer not to say                      | 0 (0%)                                       | 6 (2.5%)                |
| <b>Hispanic</b>                        | 40 (16.9%)                                   | 55 (23.2%)              |
| <b>Race</b>                            |                                              |                         |
| White                                  | 149 (62.6%)                                  | 75 (31.6%)              |
| Black                                  | 76 (31.9%)                                   | 119 (50.2%)             |
| Other                                  | 30 (12.6%)                                   | 59 (24.9%)              |
| <b>Smoking variables</b>               |                                              |                         |
| Nicotine dependence (range 1-10)       | <i>M</i> = 5.10 (2.28)                       | -                       |
| Tried to quit in past 12 months        | 141 (59.2%)                                  | -                       |
| Live with a smoker                     | -                                            | 104 (43.9%)             |
| Tried a cigarette                      | -                                            | 20 (8.5%)               |
| <b>Colorblind</b>                      | 16 (6.7%)                                    | 20 (8.5%)               |
| <b>Income (total yearly household)</b> |                                              |                         |
| \$0 - \$9,999                          | 93 (39.7%)                                   | -                       |
| \$10,000 - \$19,999                    | 56 (23.9%)                                   | -                       |
| \$20,000+                              | 85 (36.3%)                                   | -                       |
| <b>Education</b>                       |                                              |                         |
| Less than high school diploma          | 91 (38.2%)                                   | -                       |
| High school graduate                   | 147 (61.8%)                                  | -                       |
| Some college                           | 59 (24.8%)                                   | -                       |
| College graduate                       | 31 (13%)                                     | -                       |
| <b>Benefits program recipient</b>      |                                              |                         |
| Emergency food                         | 101 (42.4%)                                  | -                       |
| WIC                                    | 32 (13.4%)                                   | -                       |
| SNAP                                   | 151 (63.4%)                                  | -                       |
| <b>Cigarette brand preference</b>      |                                              |                         |
| Camel                                  | 5 (2.1%)                                     | -                       |
| Marlboro                               | 48 (20.2%)                                   | -                       |
| Newport                                | 112 (47.1%)                                  | -                       |
| Other                                  | 73 (30.7%)                                   | -                       |

*Note.* Percentages are based on the number of respondents with non-missing data for that variable. WIC = Special Supplemental Nutrition Program for Women, Infants, and Children. SNAP = Supplemental Nutrition Assistance Program.
