# Supplementary material
Source: PubMed Central journal article supplement (PMC6251633)
Supplement: ntx244_suppl_supplemental-table-b.pdf [file ntx244_suppl_supplemental-table-b.pdf]

Supplemental Table B. *Descriptive statistics for variables, May 2016*

|                           | Means ( <i>SD</i> ) or <i>N</i> 's (valid %) |                         |
|---------------------------|----------------------------------------------|-------------------------|
|                           | Adults ( <i>N</i> = 238)                     | Youth ( <i>N</i> = 237) |
| <b>Visual attention</b>   |                                              |                         |
| Brand                     | 29.23 (23.49)                                | 30.25 (21.30)           |
| Warning                   | 25.69 (23.62)                                | 26.64 (22.29)           |
| Image                     | 12.04 (12.10)                                | 12.94 (11.84)           |
| <b>Negative affect</b>    | 2.24 (1.14)                                  | 2.33 (.99)              |
| <b>Risk beliefs</b>       |                                              |                         |
| Old                       | 3.58 (.91)                                   | 3.30 (1.26)             |
| New                       | 3.13 (1.09)                                  | 3.96 (1.19)             |
| <b>Smoking outcomes</b>   |                                              |                         |
| Intention to quit         | <i>N</i> = 67 (28.2%)                        | --                      |
| Susceptibility to smoking | --                                           | <i>N</i> = 89 (37.6%)   |

*Note.* Fixation variables were measured in seconds. Negative affect was measured on a scale of 1-5. Old risk beliefs were measured on a scale of 0-4. New risk beliefs were measured on a scale of 0-4 for adults and 0-5 for youth.
