# Supplementary material
Source: PubMed Central journal article supplement (PMC6251633)
Supplement: ntx244_suppl_supplementary-table-c.pdf [file ntx244_suppl_supplementary-table-c.pdf]

Supplementary Table C. *Regression coefficients (unstandardized) with standard errors or odds ratios predicting adult outcomes, May 2016*

|                               | Fixation time<br>on brand | Fixation time<br>on warning | Fixation time<br>on image | Negative affect         | Old risk<br>beliefs    | New risk<br>beliefs | Intention to quit<br>OR [95% CI] |
|-------------------------------|---------------------------|-----------------------------|---------------------------|-------------------------|------------------------|---------------------|----------------------------------|
| <b>Condition (v. control)</b> |                           |                             |                           |                         |                        |                     |                                  |
| 30%                           | -36.85(2.52)***           | --                          | --                        | 1.34 (.15)***           | -.05 (.15)             | .17 (.18)           | 1.89 [.79, 4.52]                 |
| 50%                           | -43.92(2.49)***           | --                          | --                        | 1.19 (.15)***           | .07 (.15)              | .27 (.18)           | 3.13 [1.30, 7.54]*               |
| <b>Covariates</b>             |                           |                             |                           |                         |                        |                     |                                  |
| Age                           | -.19 (.08)*               | --                          | --                        | .02 (.01)**             | .01 (.01)              | -.004 (.01)         | 1.03 [1.003, 1.06]*              |
| Male (v. female)              | -4.27 (2.13)*             | --                          | --                        | -.17 (.13)              | -.06 (.13)             | -.33 (.15)*         | .81 [.40, 1.63]                  |
| Hispanic (v. non-Hispanic)    | -.15 (2.92)               | --                          | --                        | .32 (.18) <sup>#</sup>  | .20 (.17)              | .02 (.21)           | 1.89 [.75, 4.73]                 |
| Black                         | -.78 (2.75)               | --                          | --                        | .41 (.17)*              | .12 (.16)              | .06 (.20)           | 2.06 [.86, 4.98]                 |
| Other, non-White race         | -2.07 (3.39)              | --                          | --                        | -.04 (.20)              | -.19 (.20)             | -.12 (.24)          | 1.14 [.39, 3.28]                 |
| \$10K-\$19,999 (v. <\$10K)    | 1.38 (2.73)               | --                          | --                        | .09 (.16)               | .25 (.16)              | .30 (.19)           | 2.47 [1.02, 5.98]*               |
| \$20K+ (v. < \$10K)           | -.30 (2.63)               | --                          | --                        | .21 (.16)               | .27 (.16) <sup>#</sup> | .08 (.19)           | 1.44 [.60, 3.42]                 |
| High school (v. no HS)        | -.92 (2.26)               | --                          | --                        | -.23 (.14) <sup>#</sup> | .08 (.13)              | .15 (.16)           | .74 [.34, 1.57]                  |
| College (v. no college)       | -1.73 (3.19)              | --                          | --                        | .08 (.19)               | -.06 (.19)             | -.02 (.22)          | 1.82 [.68, 4.87]                 |
| Nicotine dependence           | -.13 (.50)                | --                          | --                        | .01 (.03)               | .01 (.03)              | -.02 (.04)          | .88 [.75, 1.03]                  |
| Previous quit attempt         | -.85 (2.22)               | --                          | --                        | .43 (.13)***            | .06 (.13)              | .21 (.16)           | 3.57 [1.63, 7.79]***             |
| Emergency food                | .59 (2.39)                | --                          | --                        | .24 (.15) <sup>#</sup>  | .27 (.14) <sup>#</sup> | .24 (.17)           | 1.26 [.56, 2.80]                 |
| WIC recipient                 | 3.27 (3.22)               | --                          | --                        | -.13 (.19)              | -.06 (.19)             | .04 (.23)           | 1.01 [.34, 3.01]                 |
| SNAP recipient                | -4.30 (2.74)              | --                          | --                        | -.04 (.17)              | -.08 (.16)             | .12 (.20)           | .40 [.16, 1.01] <sup>#</sup>     |
| Colorblind                    | 11.07 (4.48)*             | --                          | --                        | -.16 (.26)              | -.12 (.25)             | .27 (.31)           | 1.15 [.28, 4.71]                 |
| Camel preference (v. other)   | -5.37 (7.02)              | --                          | --                        | .26 (.43)               | .25 (.42)              | -.13 (.51)          | 2.65 [.21, 33.07]                |
| Marlboro (v. other)           | .52 (3.02)                | --                          | --                        | .58 (.18)**             | .36 (.18)*             | .02 (.22)           | 1.75 [.61, 5.00]                 |
| Newport (v. other)            | 1.08 (2.79)               | --                          | --                        | .37 (.17)*              | .16 (.17)              | .02 (.20)           | 2.38 [.90, 6.29] <sup>#</sup>    |
| <b>Constant</b>               | 69.98(5.51)***            | --                          | --                        | .09 (.34)               | 2.89 (.33)***          | 2.92 (.40)***       | .03***                           |
| <b>Adjusted R<sup>2</sup></b> | .63                       | --                          | --                        | .39                     | -.01                   | .01                 | --                               |
| <b>N</b>                      | 224                       | --                          | --                        | 226                     | 230                    | 230                 | 230                              |

*Note.* OR = odds ratio. CI = confidence interval. <sup>#</sup> $p \leq .10$ , \* $p \leq .05$ , \*\* $p \leq .01$ , \*\*\* $p \leq .001$ . All regressions are linear except intention to quit, which is binary logistic. Because the control group participants did not see any GWLs, we did not run regression models for fixation time on warning or fixation time on image when using the control group as the reference group.
