# Supplementary material
Source: PubMed Central journal article supplement (PMC6251633)
Supplement: ntx244_suppl_supplementary-table-d.pdf [file ntx244_suppl_supplementary-table-d.pdf]

Supplementary Table D. *Regression coefficients (unstandardized) with standard errors predicting youth outcomes, May 2016*

|                                | Fixation time<br>on brand | Fixation time<br>on warning | Fixation time<br>on image | Negative affect        | Old risk<br>beliefs    | New risk<br>beliefs      | Susceptibility<br>OR [95% CI] |
|--------------------------------|---------------------------|-----------------------------|---------------------------|------------------------|------------------------|--------------------------|-------------------------------|
| <b>Condition (vs. control)</b> |                           |                             |                           |                        |                        |                          |                               |
| 30%                            | -33.17 (2.29)***          | --                          | --                        | .53 (.15)***           | .38 (.21) <sup>#</sup> | .37 (.19) <sup>#</sup>   | .82 [.41, 1.65]               |
| 50%                            | -36.39 (2.33)***          | --                          | --                        | .61 (.16)***           | .08 (.21)              | .30 (.20)                | 1.18 [.59, 2.35]              |
| <b>Covariates</b>              |                           |                             |                           |                        |                        |                          |                               |
| Age                            | 1.22 (.98)                | --                          | --                        | -.07 (.07)             | .05 (.09)              | .14 (.08)                | .93 [.69, 1.26]               |
| Male (vs. female)              | .03 (1.89)                | --                          | --                        | -.35 (.13)**           | -.12 (.17)             | -.31 (.16) <sup>#</sup>  | .63 [.35, 1.13]               |
| Other sex (vs. female)         | -1.28 (6.45)              | --                          | --                        | -.04 (.43)             | .10 (.54)              | .24 (.51)                | 1.65 [.30, 8.97]              |
| Hispanic (vs. non-Hispanic)    | .98 (2.39)                | --                          | --                        | -.08 (.16)             | .25 (.21)              | .18 (.20)                | 1.39 [.70, 2.78]              |
| Black                          | -2.34 (2.01)              | --                          | --                        | -.05 (.13)             | -.10 (.18)             | .09 (.17)                | .68 [.37, 1.25]               |
| Other, non-White race          | .11 (2.22)                | --                          | --                        | .17 (.15)              | -.03 (.20)             | -.14 (.19)               | .64 [.32, 1.27]               |
| Previous smoking               | -9.31 (3.55)**            | --                          | --                        | .38 (.22) <sup>#</sup> | -.16 (.31)             | .09 (.29)                | 3.38 [1.20, 9.48]*            |
| Smoking environment            | -1.21 (1.93)              | --                          | --                        | -.002 (.13)            | .11 (.17)              | .09 (.16)                | 1.54 [.87, 2.73]              |
| Sensation seeking              | 1.80 (1.32)               | --                          | --                        | .02 (.09)              | -.07 (.12)             | -.01 (.11)               | 1.21 [.81, 1.79]              |
| Colorblind                     | 4.15 (3.37)               | --                          | --                        | .48 (.23)*             | .14 (.31)              | .16 (.29)                | 2.14 [.78, 5.83]              |
| <b>Constant</b>                | 36.91 (12.65)**           | --                          | --                        | 2.84 (.85)***          | 2.66 (1.14)*           | 2.08 (1.07) <sup>#</sup> | 1.02                          |
| <b>Adjusted R<sup>2</sup></b>  | .58                       | --                          | --                        | .12                    | -.02                   | .01                      | --                            |
| <b>N</b>                       | 223                       | --                          | --                        | 226                    | 233                    | 233                      | 233                           |

*Note.* OR = odds ratio. CI = confidence interval. <sup>#</sup> $p \leq .10$ , \* $p \leq .05$ , \*\* $p \leq .01$ , \*\*\* $p \leq .001$ . All regressions are linear except susceptibility to smoke, which is binary logistic. Because the control group participants did not see any GWLs, we did not run regression models for fixation time on warning or fixation time on image when using the control group as the reference group.
